# Supplementary material for: Elucidating the Role of Ezh2 in Tolerogenic Function of NOD Bone Marrow-Derived Dendritic Cells Expressing Constitutively Active Stat5b
Source: PubMed Central journal article supplement (PMC7554732; doi:10.3390/ijms21186453), 2020-09-04
Supplement: ijms-21-06453-s001.pdf [file ijms-21-06453-s001.pdf]

Supplementary figure S1

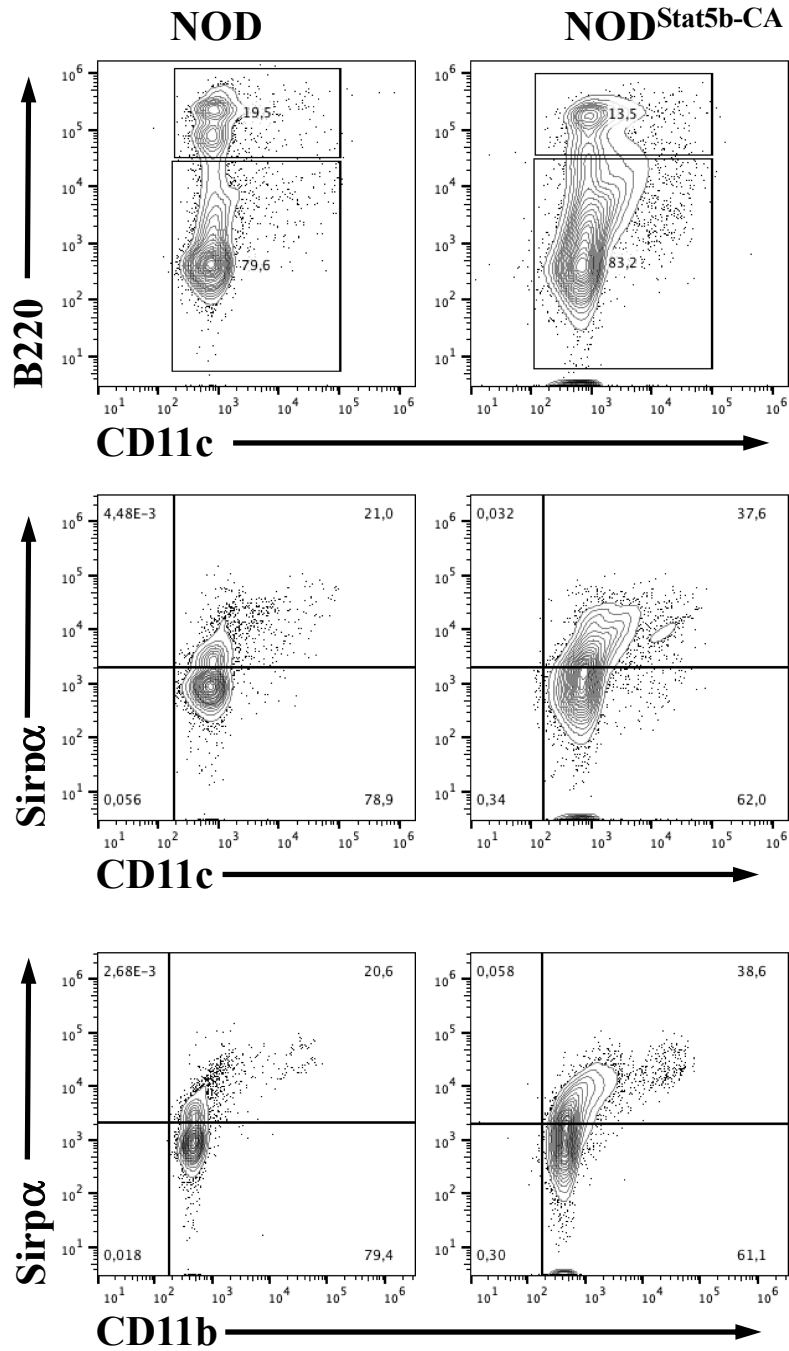

**Figure S1.** Percentages of Sirp $\alpha$ <sup>+</sup>-expressing BMDCs generated from NOD and NOD<sup>Stat5b-CA</sup> mice. BMDCs were derived from NOD and NOD.CD11c<sup>Stat5b-CA</sup> mice using Flt3L (50 ng/mL) for 6 days and analyzed by flow cytometry. Data are a representative FACS profile of CD11c<sup>+</sup>B220<sup>+</sup> cells, CD11c<sup>+</sup>B220<sup>-</sup>Sirp $\alpha$ <sup>+</sup> cells, and CD11c<sup>+</sup> B220<sup>-</sup>CD11b<sup>+</sup>Sirp $\alpha$ <sup>+</sup> cell subsets.
